Ruocco A.<sup>1</sup>; De Lazzari M.<sup>1</sup>; Baritussio A.<sup>1</sup>; Rizzon G.<sup>2</sup>; Babuin L.<sup>1</sup>; Lacognata C.<sup>2</sup>; Zucchetto P.<sup>3</sup>; Giorgi B.<sup>2</sup>; Quaia E.<sup>2</sup>; Illiceto S.<sup>1</sup>; Perazzolo Marra M.<sup>1</sup>

<sup>3</sup>University Hospital of Padova, Nuclear Medicine, Padua, Italy

**Learning points:** the clinical data led us to think of an ischemic heart disease. Once we ruled it out, the diagnosis became challenging. Non-compaction could be due to a dilated cardiomyopathy and may be a consequence of LV remodelling rather than the cause, moreover troponin release is atypical in this setting. Cardiac sarcoidosis is commonly seen in basal segments, particularly of the septum and wall thinning is not the first manifestation. PET-CMR showed a LV inflammation with biventricular dysfunction. By Literature, the increasing use of CMR showed that in arrhythmogenic cardiomyopathy, the LV involvement is much more common than expected and a sizeable proportion of patients has a LV disease which parallels or exceeds the severity of right ventricular involvement, as in this case. With disease progression an epicardial scar can become transmural, causing thinning of myocardial wall over time. In our opinion, the most likely diagnosis was a hot phase of arrhythmogenic cardiomyopathy.

Abstract P105 Figure1.

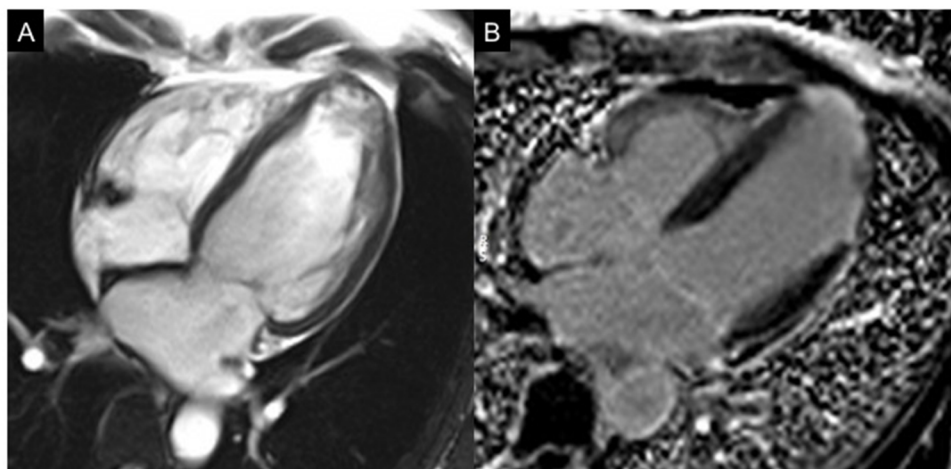

Four chamber diastolic frame of cine sequence (first CMR scan) showing left ventricle hypertrabeculation and lateral thinned wall (A). Post contrast image in the same long axis view (second CMR scan) showing myocardial fibrosis with epicardial/transmural pattern in lateral and apical segments.
